# Supplementary material for: Improving the performance of ternary organic solar cells using metal oxides as charge-transport layers
Source: Royal Society of Chemistry journal article supplement (doi:10.1039/d3cp01454a), 2023-01-01
Supplement: d3cp01454a1.pdf [file d3cp01454a1.pdf]

## Supporting Information for

# Improving performance of ternary organic solar cells using metal oxides as charge transport layers

Zhihai Liu,<sup>a</sup> Lei Wang,<sup>b</sup> Xiaoyin Xie<sup>c,\*</sup> and Ping Chen<sup>a,\*</sup>

<sup>a</sup>*School of Physics and Electronic Information, Yantai University, Yantai 264005, China. E-mail:*

[chenping@ytu.edu.cn](mailto:chenping@ytu.edu.cn)

<sup>b</sup>*School of Artificial Intelligence, Beijing Technology and Business University, Beijing, 100048, China*

<sup>c</sup>*School of Chemistry and Chemical Technology, Hubei Polytechnic University, Huangshi 435003,*

*China. Email: [xyxie@hbpu.edu.cn](mailto:xyxie@hbpu.edu.cn)*

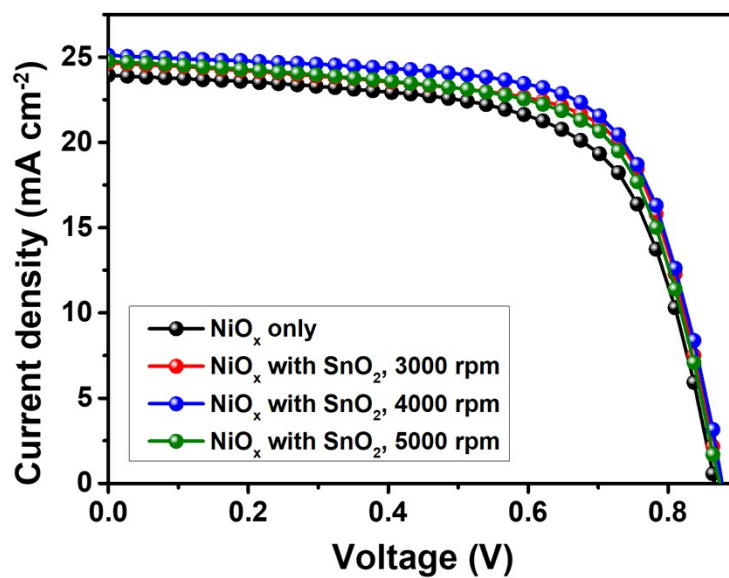

Fig. S1.  $J$ - $V$  characteristics of the  $\text{NiO}_x$ -based OSCs without and with  $\text{SnO}_2$  spin coated at a speed of 3000, 4000 or 5000 rpm.

Table S1. Device parameters of the  $\text{NiO}_x$ -based OSCs without and with  $\text{SnO}_2$  spin coated at a speed of 3000, 4000 or 5000 rpm.

| Device configuration           | $V_{oc}$ (V) | $J_{sc}$ ( $\text{mA cm}^{-2}$ ) | FF (%) | Average PCE (%) |
|--------------------------------|--------------|----------------------------------|--------|-----------------|
| $\text{NiO}_x$ only            | 0.87         | 24.3                             | 71.7   | 15.2            |
| With $\text{SnO}_2$ , 3000 rpm | 0.88         | 24.5                             | 72.8   | 15.7            |
| With $\text{SnO}_2$ , 4000 rpm | 0.88         | 25.2                             | 73.2   | 16.2            |
| With $\text{SnO}_2$ , 5000 rpm | 0.88         | 24.9                             | 72.5   | 15.9            |

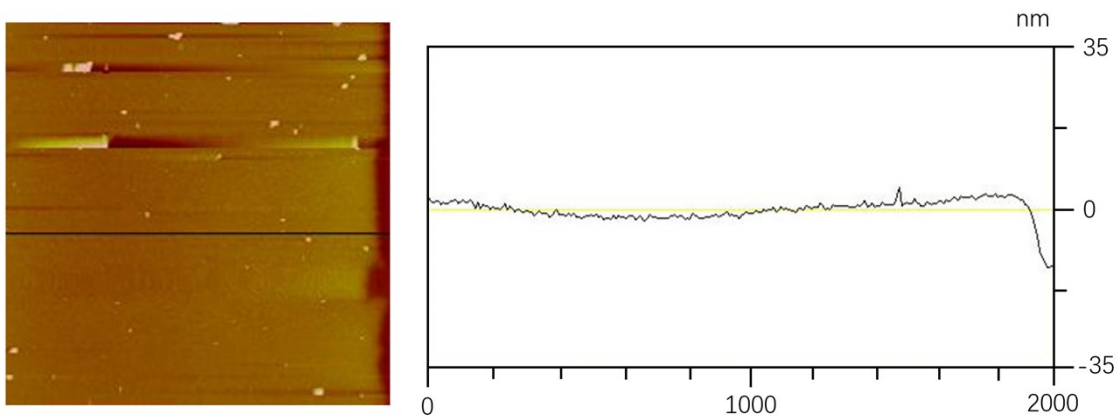

Fig. S2. AFM image of the partly covered SnO<sub>2</sub> film, with SnO<sub>2</sub> spin-coated at a speed of 4000 rpm.

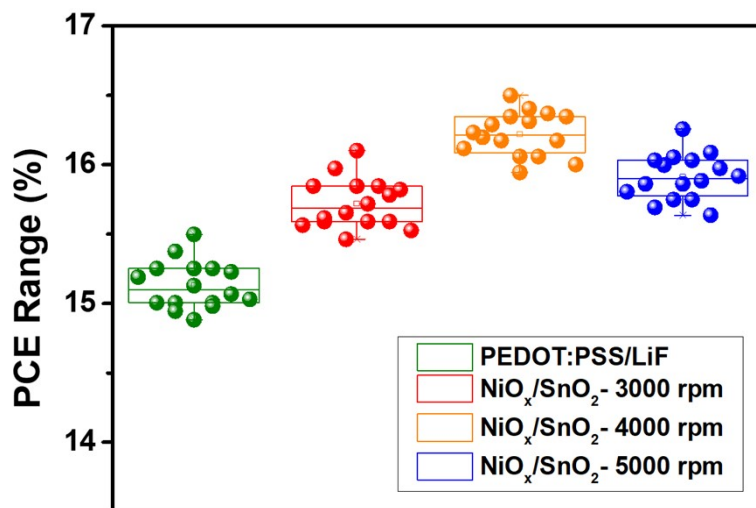

Fig. S3. PCE variations with standard deviations for OSCs using PEDOT:PSS/LiF and NiO<sub>x</sub>/SnO<sub>2</sub> as the CTLs.

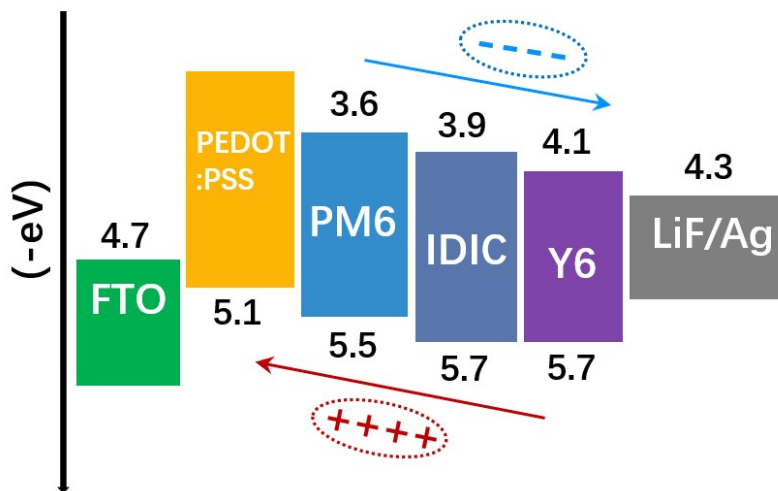

Fig. S4. Energy level alignment of the control OSCs using PEDOT:PSS and LiF as the CTLs.

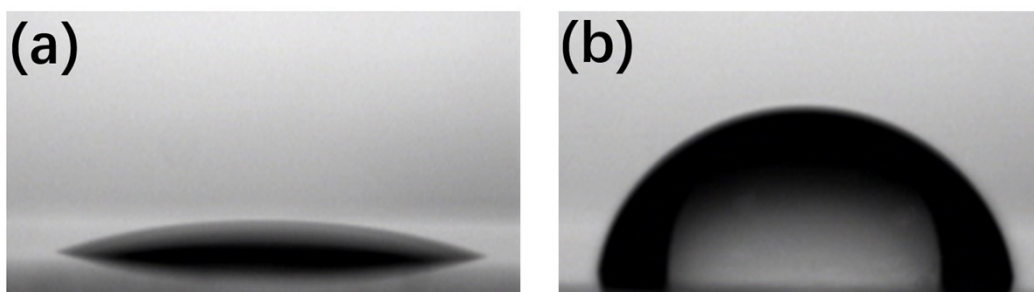

Fig. S5. Contact angle measurements of PEDOT:PSS (a) and NiO<sub>x</sub> (b).

Table S2. Average and best PCEs for ternary organic solar cells using PM6-based active layers reported in recent years.

| Component                      | Average PCE   | Best PCE      | Reference                                          |
|--------------------------------|---------------|---------------|----------------------------------------------------|
| <b>PM6:IDIC:Y6</b>             | <b>16.20%</b> | <b>16.60%</b> | <i>This work</i>                                   |
| <b>PM6:IDIC:Y6</b>             | <b>16.39%</b> | <b>16.52%</b> | <i>Adv. Energy Mater.</i> 2019, 1901728            |
| <b>PM6:IDIC:Y6</b>             | <b>16.51%</b> | <b>16.86%</b> | <i>J. Mater. Chem. A</i> 2021, 9, 17035            |
| PM6:TIT-2Cl:Y6                 | 16.79%        | 17.00%        | <i>Adv. Funct. Mater.</i> 2022, 2200629            |
| PM6:PC <sub>61</sub> BM:Y6     | 15.90%        | 16.50%        | <i>Adv. Mater.</i> 2019, 1902302                   |
| PM6:PC <sub>71</sub> BM:Y6     | 16.60%        | 17.10%        | <i>Adv. Sci.</i> 2020, 1903419                     |
| PM6:IT-4F:Y6                   | 13.60%        | 14.14%        | <i>Dyes and Pigments</i> 2020, 181, 108613         |
| PM6:N3:PC <sub>71</sub> BM     | 16.80%        | 17.42%        | <i>Nat. Commun.</i> 2021, 12, 468                  |
| PM6:BTP-MCA:Y6                 | 16.40%        | 17.00%        | <i>ACS Appl. Mater. Interfaces</i> 2022, 14, 12461 |
| PM6:Y-T:Y6                     | 17.04%        | 17.37%        | <i>Nano Energy</i> 2021, 90, 106538                |
| PM6:PM7:PC <sub>71</sub> BM:Y6 | 17.71%        | 18.09%        | <i>Nat. Commun.</i> 2021, 12, 309                  |
| PM6:BTP-CC:Y6                  | 17.27%        | 17.55%        | <i>ACS Appl. Mater. Interfaces</i> 2022, 14, 36582 |
| PM6:PY-IT:BN-T                 | 15.85%        | 16.09%        | <i>Joule</i> 2021, 5, 914                          |
| PM6:Cor-T-PDI:Y6               | 16.35%        | 16.88%        | <i>J. Mater. Chem. C</i> 2021, 9, 3826             |
| PM6:ITIC-M:Y6                  | 13.27%        | None          | <i>Polymers</i> 2021, 13, 2398                     |
| PM6:ITC-2Br1:Y6                | 16.30%        | 16.60%        | <i>Org. Electron.</i> 2021, 91, 106085             |
